# Supplementary material
Source: HighWire-hosted journal article supplement (https://www.cmajopen.ca/highwire/filestream/81079/field_highwire_adjunct_files/0/2017-0118-1-at.pdf)

**Appendix 1 (as supplied by the authors):** Number of patients who received chemotherapy, radiotherapy or surgery as their first treatment

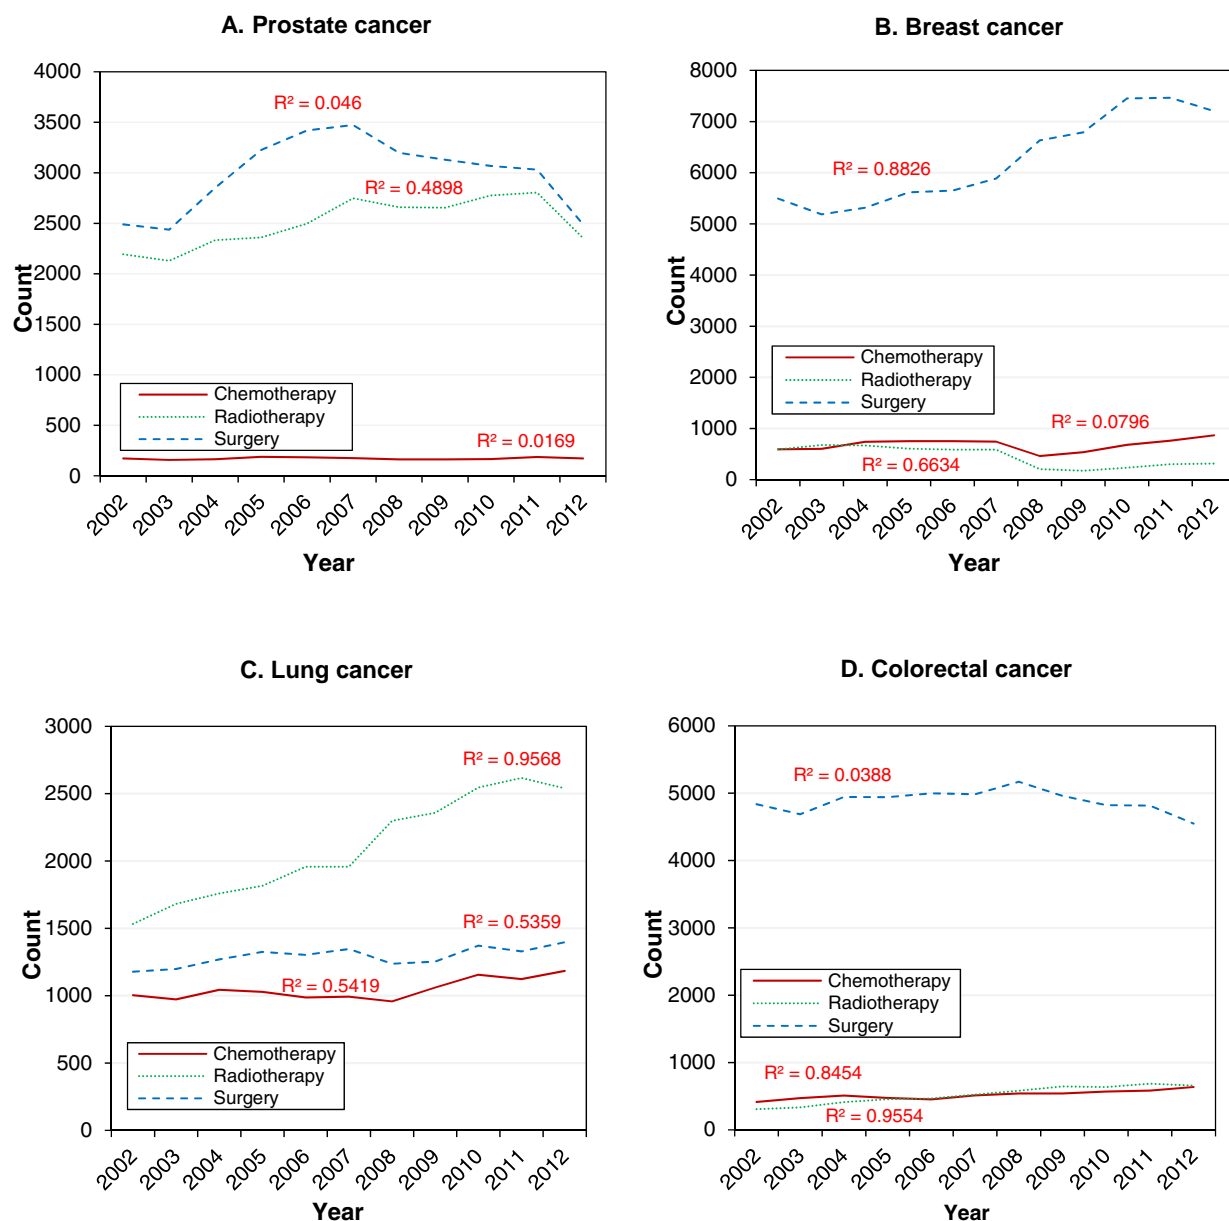

Supplement: 2017-0118-1-at.pdf [file 2017-0118-1-at.pdf]
